# Supplementary material
Source: Copernicus journal article supplement (doi:10.5194/acp-26-7647-2026)
Supplement: Supplementary file [file acp-26-7647-2026-supplement-title-page.pdf › acp-26-7647-2026-supplement-title-page.pdf]

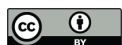

*Supplement of*

## **European HFC emissions evaluated with multiple atmospheric inverse models and UNFCCC national inventories**

**Hélène De Longueville et al.**

*Correspondence to:* Hélène De Longueville ([helene.delongueville@bristol.ac.uk](mailto:helene.delongueville@bristol.ac.uk)) and Anita L. Ganesan ([anita.ganesan@bristol.ac.uk](mailto:anita.ganesan@bristol.ac.uk))

- [acp-26-7647-2026-supplement-title-page.pdf](#)
- [DeLonguevilleeta2026\\_suppl](#)
  - [InverseModellingResults\\_DeLongueville2026\\_7sites\\_hfc134a\\_hfc143a\\_2023\\_2024.zip](#)
  - [PARIS\\_HFC\\_Paper\\_revised\\_v2\\_supplement.pdf](#)

The copyright of individual parts of the supplement might differ from the article licence.
